# Supplementary material for: Cobalt nanoparticle-encapsulated N-doped carbon nanotubes on 3D porous carbon: a novel platform for ultrasensitive electrochemical sensing of rutin
Source: Royal Society of Chemistry journal article supplement (doi:10.1039/d5an01027f), 2026-01-01
Supplement: d5an01027f1.pdf [file d5an01027f1.pdf]

## Supplementary Material

### **Cobalt Nanoparticle-Encapsulated N-Doped Carbon Nanotubes on 3D Porous Carbon: A Novel Platform for Ultrasensitive Electrochemical Sensing of Rutin**

**Zhewei Zhang<sup>a, b</sup>, Zijian Zhao<sup>a,b,\*</sup>, Yaqi Yang<sup>a,b,\*</sup>**

*<sup>a</sup> College of Pharmacy, Shaanxi University of Chinese Medicine, Xianyang 712000, People's Republic of China*

*<sup>b</sup> College of Chemistry and Materials Engineering, Huaihua University, Huaihua 418000, People's Republic of China*

*\* Yaqi Yang, Ph.D., College of Chemistry and Materials Engineering, Huaihua University, HuaiHua, China*

*E-mail: yyq880@126.com*

*\* Zijian Zhao, Ph.D., College of Chemistry and Materials Engineering, Huaihua University, HuaiHua, China*

*E-mail: zjzhao72@163.com*

## Tables

**Table S1:** Comparison of various electrochemical methods for rutin detection

| Electrode                                                              | Linear range ( $\mu\text{M}$ ) | LOD (nM) | Ref.      |
|------------------------------------------------------------------------|--------------------------------|----------|-----------|
| CdTeQD-MMXene/GCE                                                      | 0.099-653.6                    | 0.033    | [1]       |
| NF/AuNPs/N-CPDs@FLBP/SPE                                               | 0.001-10                       | 0.033    | [2]       |
| ZIF-8@MWCNTs/CP                                                        | 0.01-190                       | 2.82     | [3]       |
| PCN-224@ARC                                                            | 0.05-1                         | 11.7     | [4]       |
| C-GCS@ZIF-F/PL                                                         | 0.1-100                        | 5.4      | [5]       |
| Ti <sub>3</sub> Al <sub>0.5</sub> Cu <sub>0.5</sub> C <sub>2</sub> MAX | 0.05-50                        | 15       | [6]       |
| FeCo@C                                                                 | 0.01-2                         | 3.41     | [7]       |
| Co@N-CNTs/3DHC                                                         | 0.0001-0.05,<br>0.05-1         | 0.0415   | This work |

**Table S2.** The detection results of rutin from actual samples of buckwheat tea and rutin tablets (n=3)

| Samples       | Added (nM) | Found (nM) | Recovery (%) | RSD (%) | Condetermined by                |
|---------------|------------|------------|--------------|---------|---------------------------------|
|               |            |            |              |         | UV-Vis<br>spectroscopy(diluted) |
| Buckwheat tea |            | 39.22±1.1  |              | 2.9     | 39.66 nM                        |
|               | 20         | 59.36±0.7  | 100.7        | 1.2     |                                 |
|               | 40         | 77.98±0.08 | 96.9         | 0.1     |                                 |
|               | 100        | 138.26±1.4 | 99.04        | 1       |                                 |
| Rutin tables  |            | 39.34±1.6  |              | 4       | 39.8 nM                         |
|               | 20         | 59.15±0.8  | 99.05        | 1.4     |                                 |
|               | 40         | 78.79±1.3  | 98.6         | 1.7     |                                 |
|               | 100        | 142.44±2.1 | 103.1        | 1.5     |                                 |

## Figures

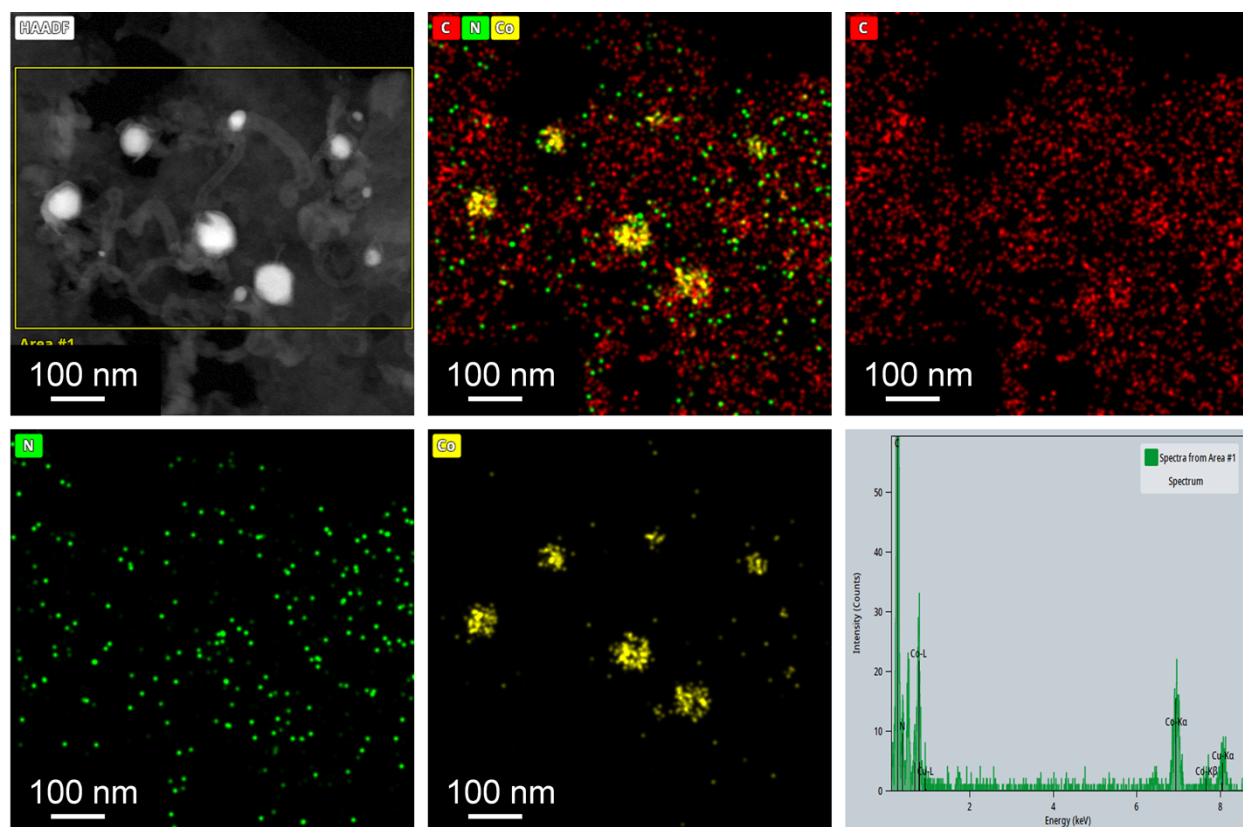

**Fig. S1.** TEM and element mapping images of Co@N-CNTs/3DHC (C, N, Co).

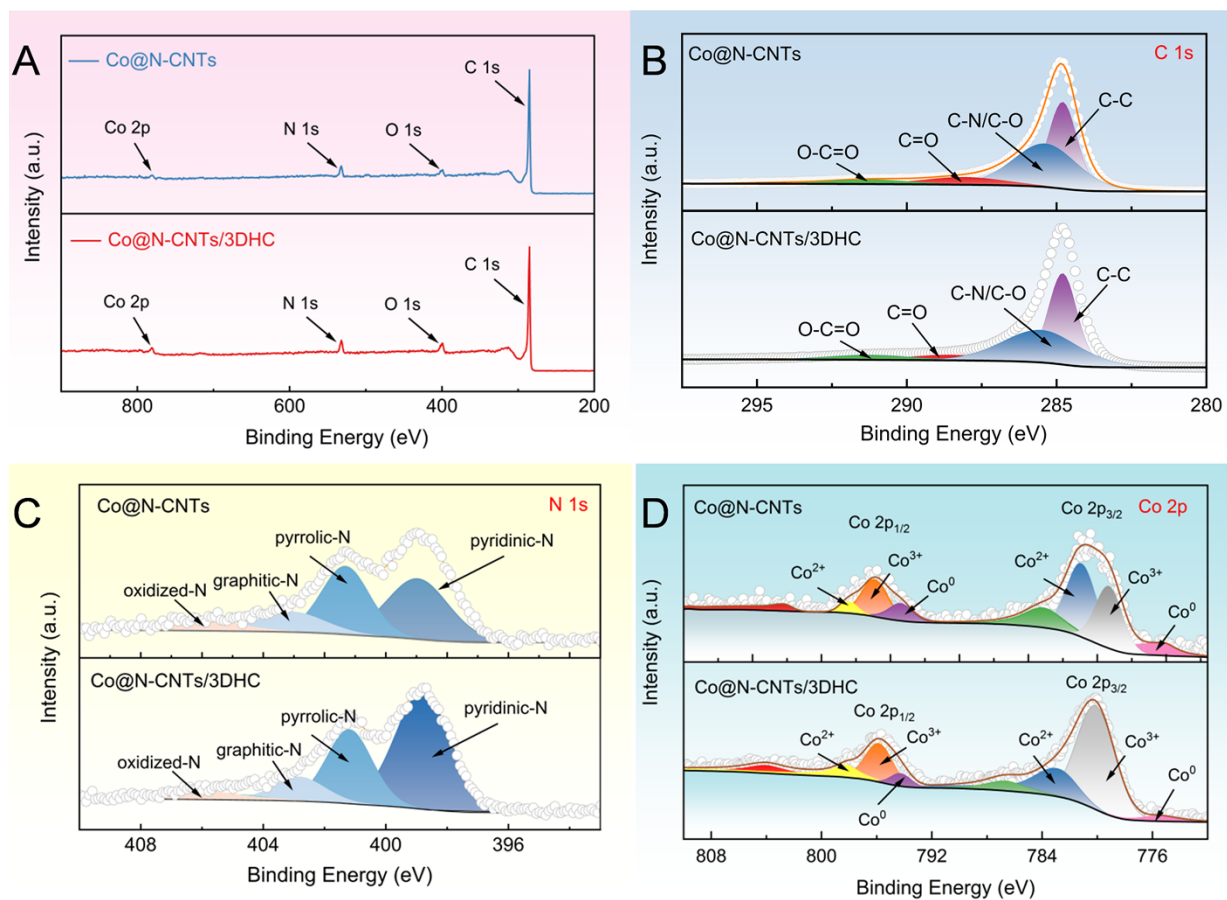

**Fig. S2.** (A) XPS spectra of Co@N-CNTs and Co@N-CNTs/3DHC; High-resolution XPS spectra of C 1s (B), N 1s (C), and Co 2p (D) in the related composite materials.

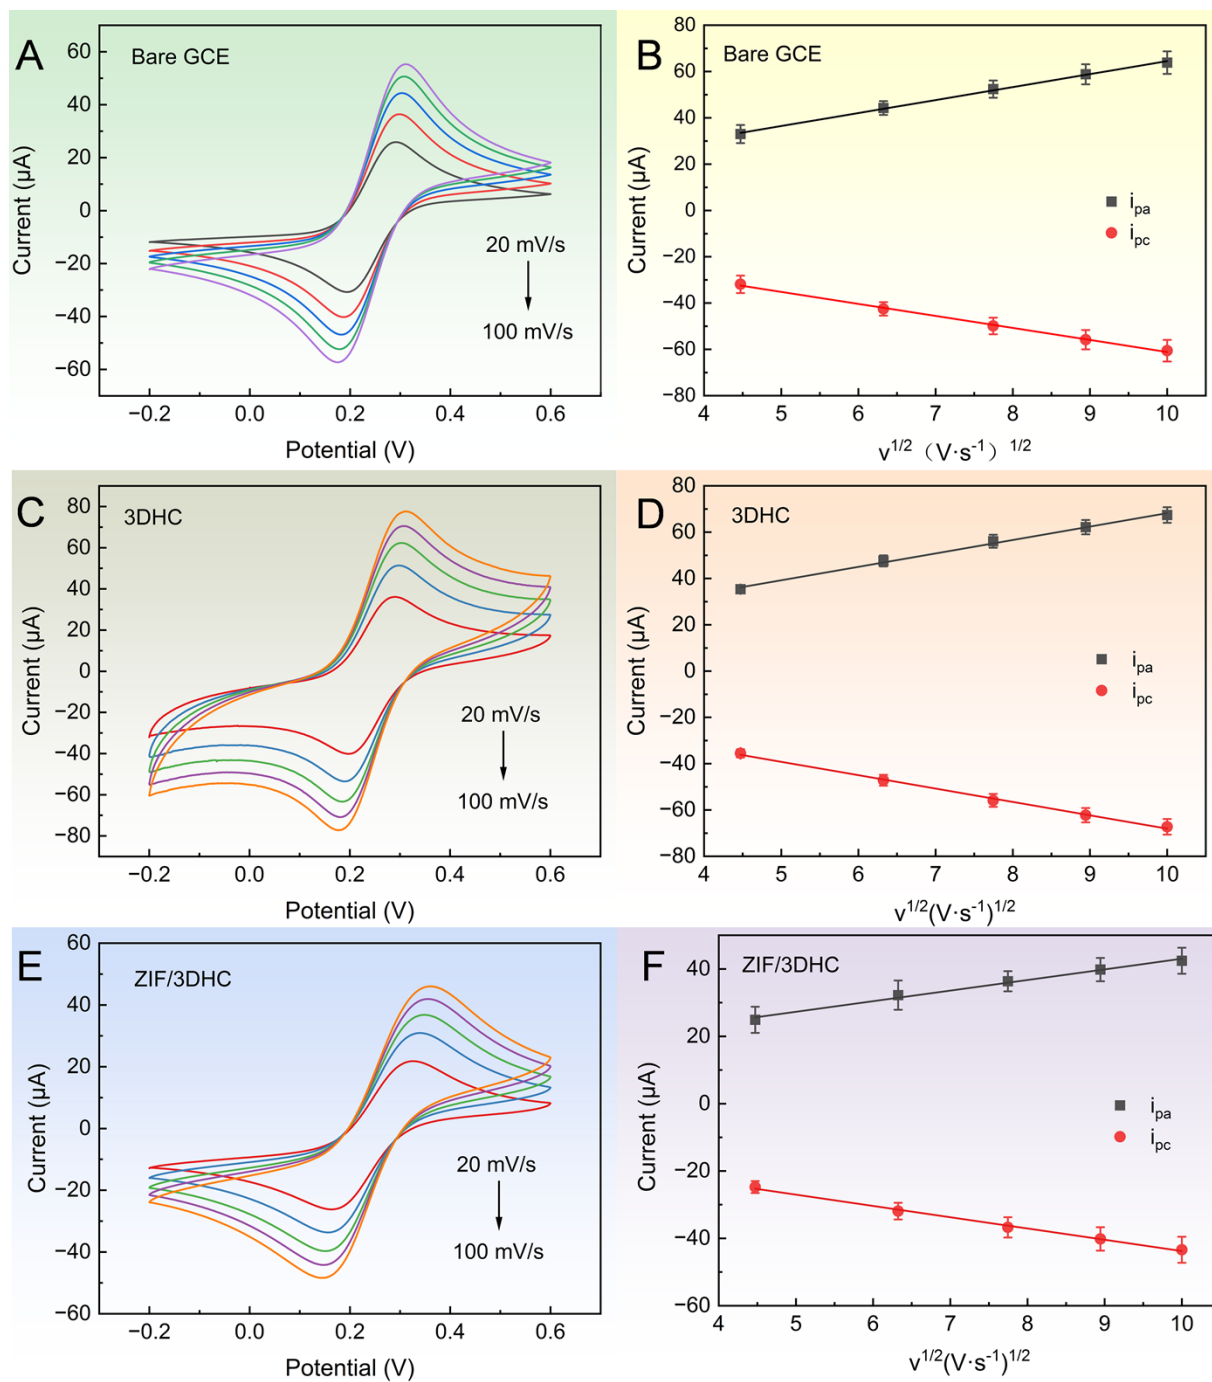

**Fig. S3.** In a 0.1M KCl solution containing  $5 \times 10^{-3}$  M  $[\text{Fe}(\text{CN})_6]^{3-}$ , (A) Bare GCE, (C) 3DHC and (E) ZIFs/3DHC show CV curves under different scan rates (20, 40, 60, 80, 100, 120, 140, 180, 200, 220, 240, 260, 280, 300); (B) Bare GCE, (D) 3DHC and (F) ZIFs/3DHC's oxidation and reduction peak currents have a linear relationship with the scan rate.

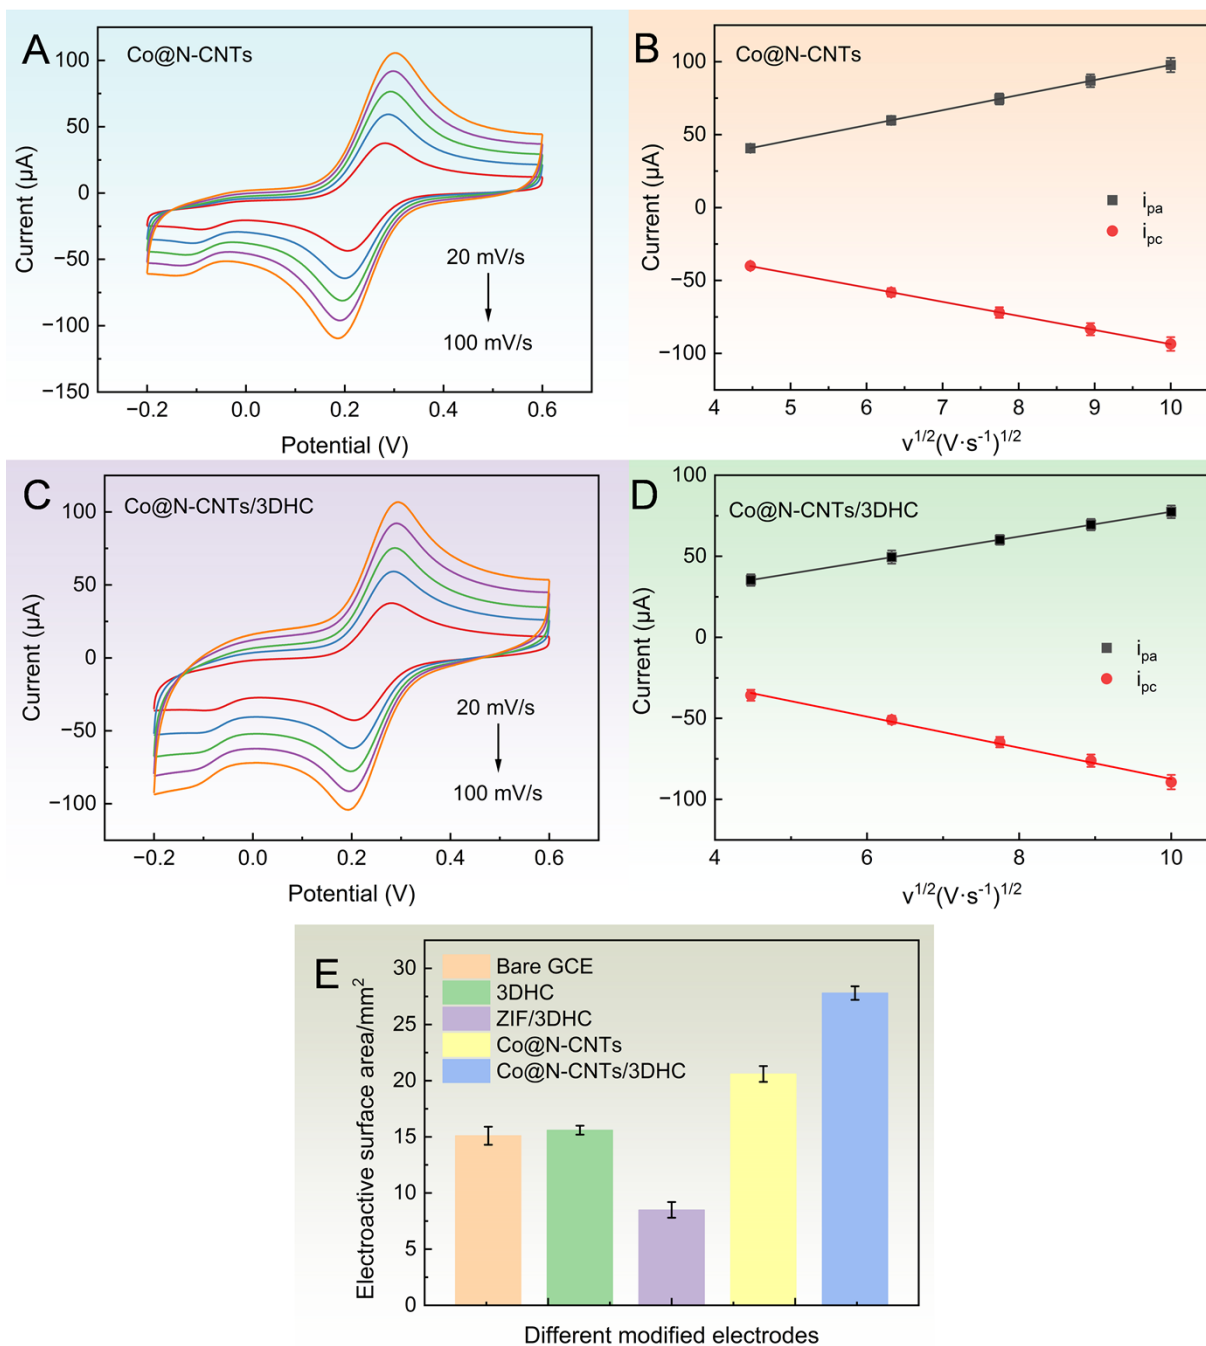

**Fig. S4.** In a 0.1M KCl solution with a  $5 \times 10^{-3}$  M  $[\text{Fe}(\text{CN})_6]^{3-}$  concentration, (A) Co@N-CNTs and (C) Co@N-CNTs/3DHC show their CV curves under different scan rates (20, 40, 60, 80, 100, 120, 140, 180, 200, 220, 240, 260, 280, 300); (B) the linear relationship between the oxidation and reduction peak currents of Co@N-CNTs and Co@N-CNTs/3DHC and the scan rate; (E) the comparison of the specific surface areas of different modified electrodes.

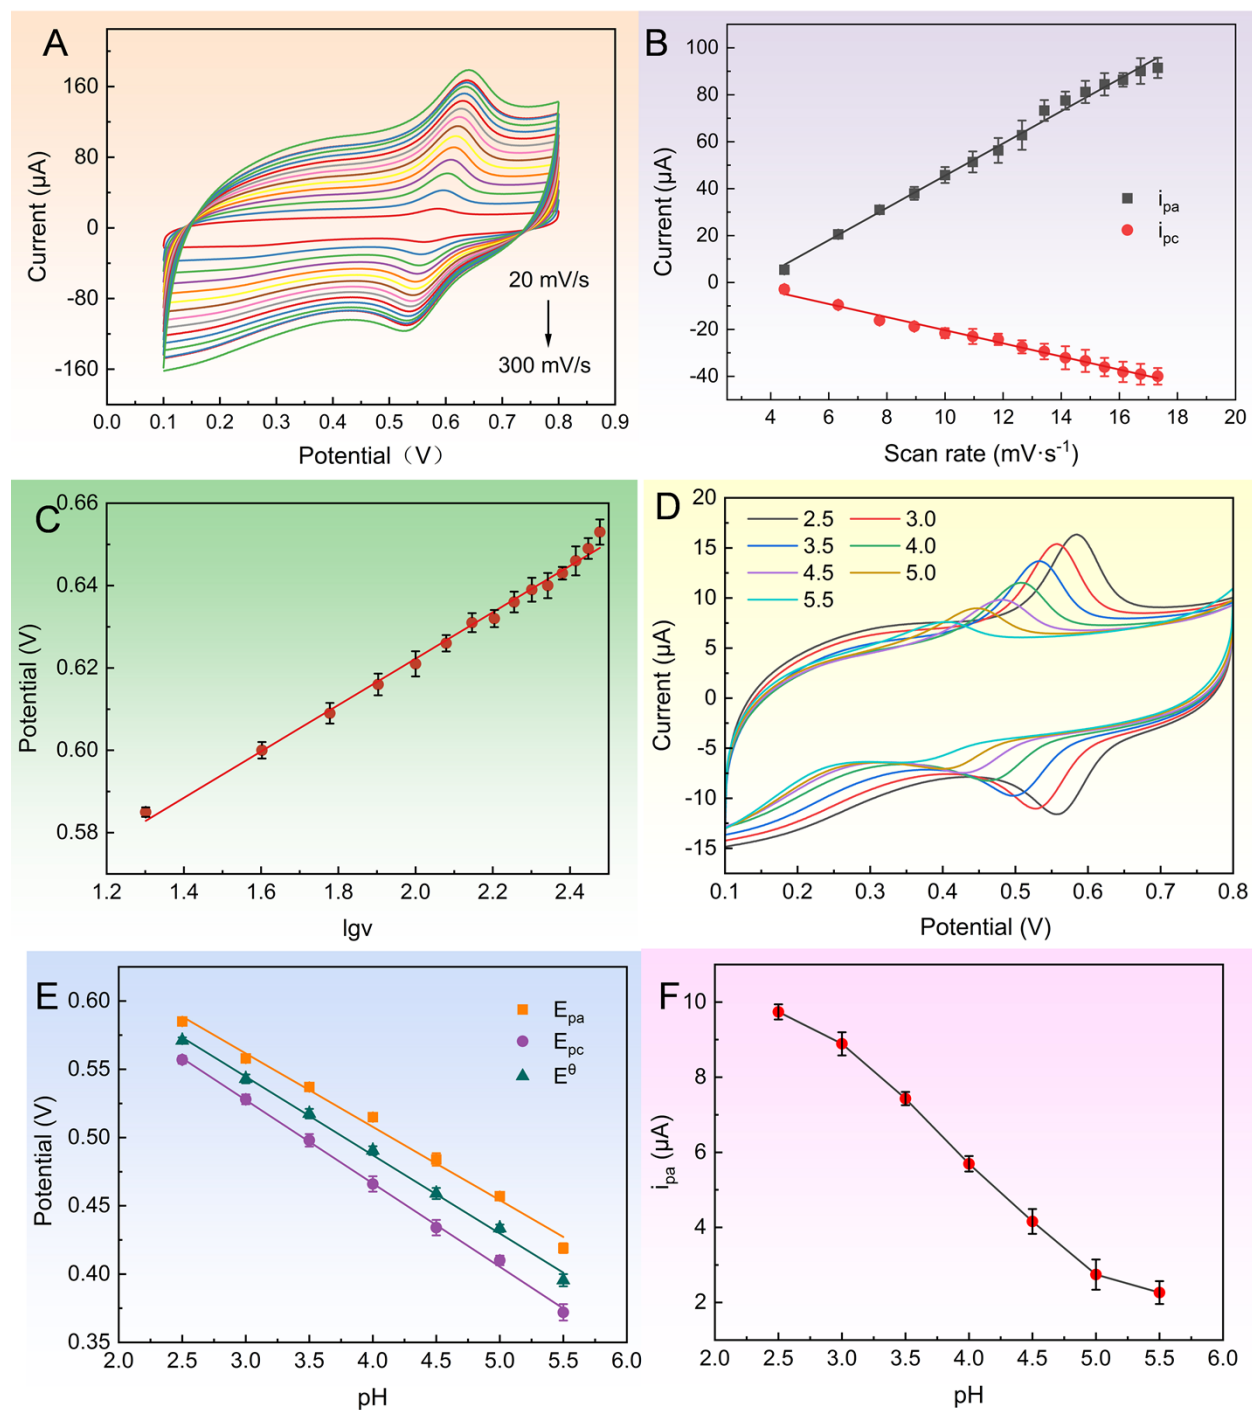

**Fig. S5.** (A) CV curves of Co@N-CNTs/3DHC under different scan rates (20, 40, 60, 80, 100, 120, 140, 180, 200, 220, 240, 260, 280, 300) at 1  $\mu$ M rutin concentration; (B) Linear relationship between scan rate and oxidation and reduction peak currents; (C) Corresponding relationship between logarithm of peak current and logarithm of scan rate; (D) Cyclic voltammograms of Co@N-CNTs/3DHC for 1  $\mu$ M rutin at different pH



values (2.5, 3.0, 4.5, 5.0, 5.5, 6.0, 6.5); (E) Linear relationship diagram between pH value and oxidation-reduction potential; (F) Linear relationship diagram between pH value and peak current.

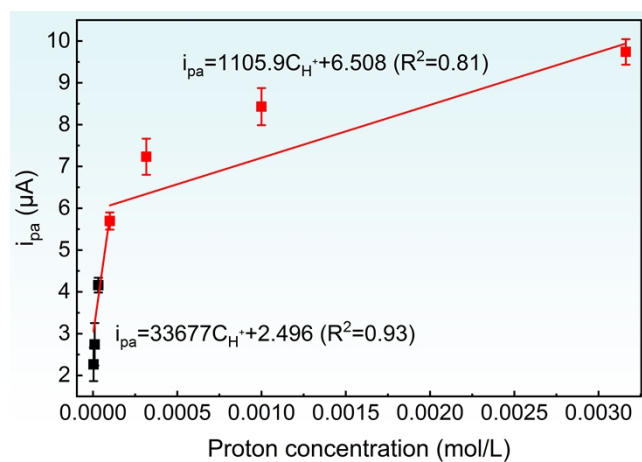

**Fig. S6.** Relationship between the anodic peak current ( $i_{pa}$ ) and proton concentration ( $[H^+]$ ) for rutin oxidation at the Co@N-CNTs/3DHC electrode.

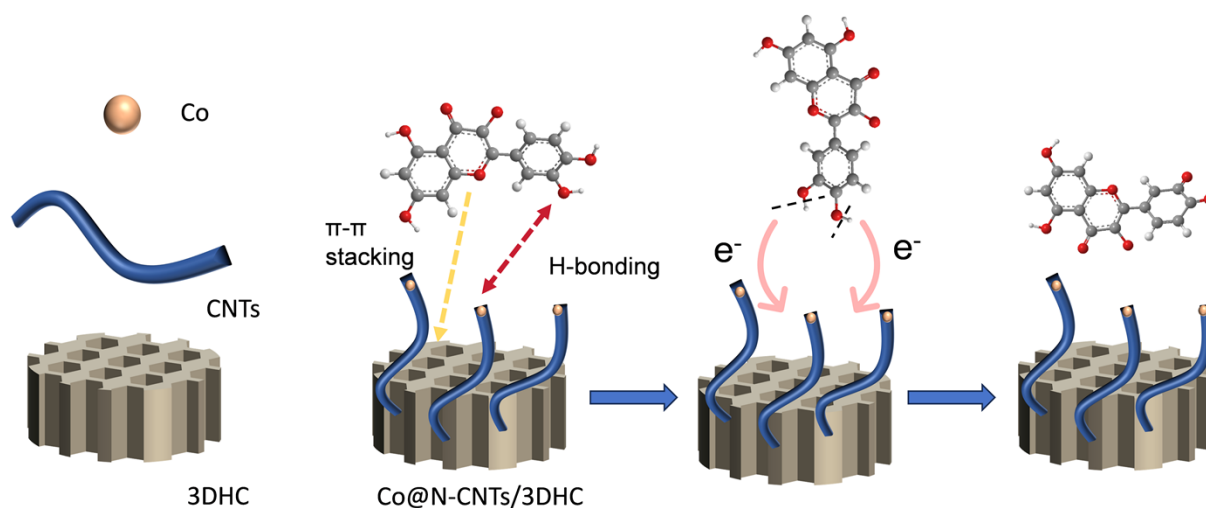

**Fig. S7.** Proposed reaction mechanism of rutin at the surface of Co@N-CNTs/3DHC/GCE.

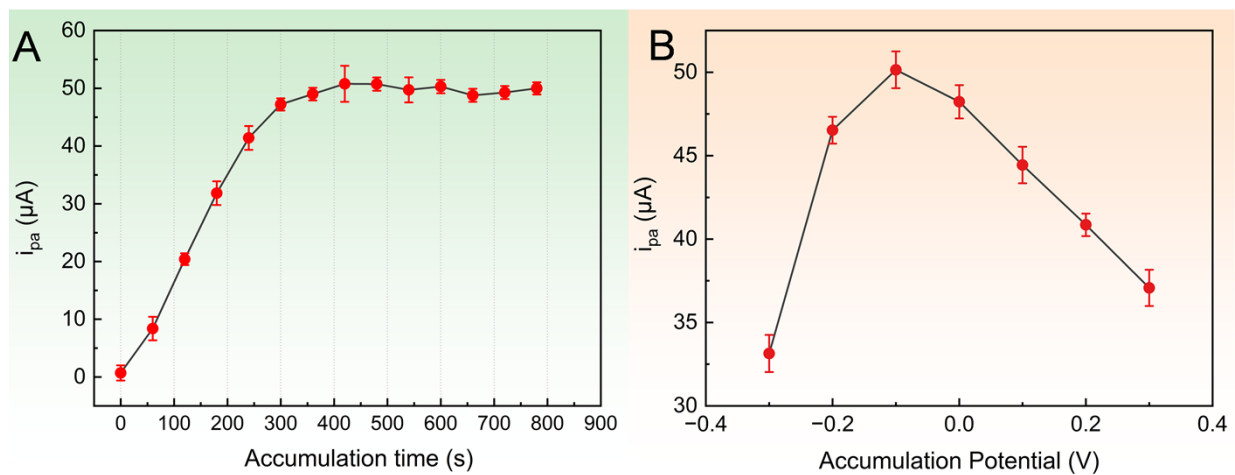

**Fig. S8.** (A) Graph showing the variation of peak current with enrichment time; (B) Graph showing the variation of peak current with enrichment potential.

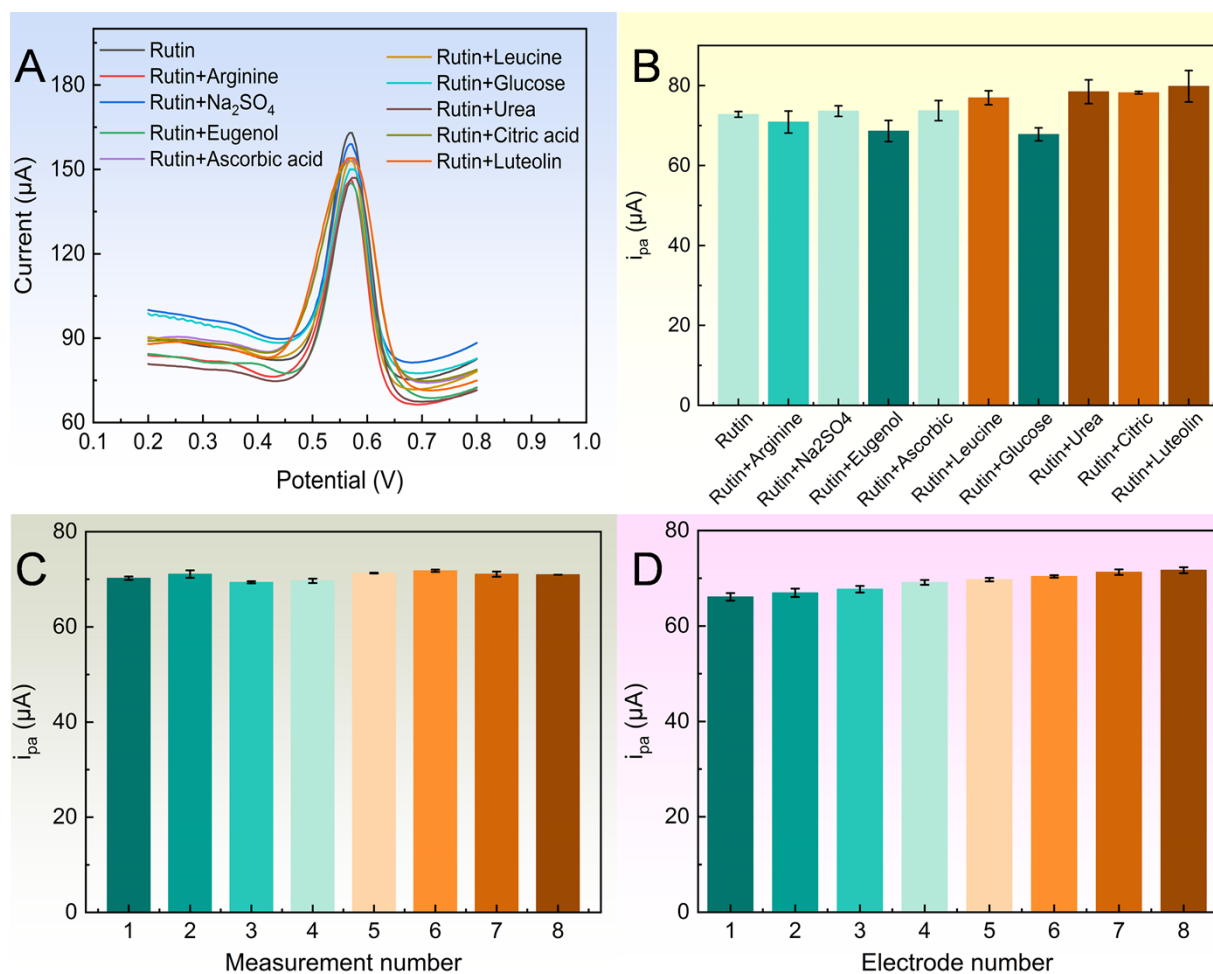

**Fig. S9.** (A) DPV of Rt on Co@N-CNTs/3DHC when various interfering substances are added; (B) Comparison of signals before and after adding interfering substances during Rt detection; (C) DPV signal obtained by repeating 8 times in 1  $\mu\text{M}$  rutin; (D) DPV signals obtained from 8 different electrodes in 1  $\mu\text{M}$ .

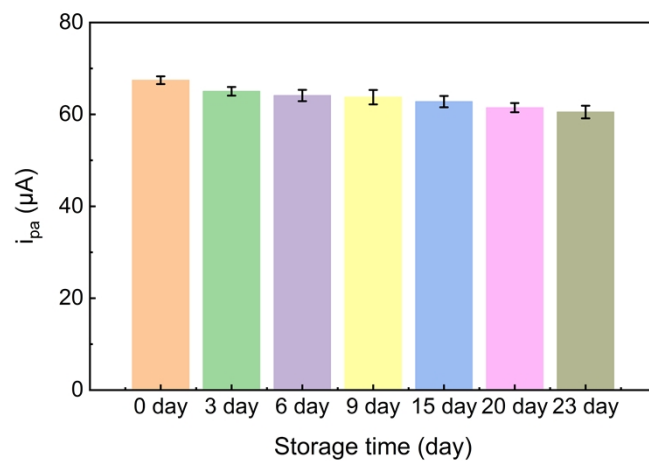

**Fig.S10.** Long-term stability test of the Co@N-CNTs/3DHC/GCE sensor.

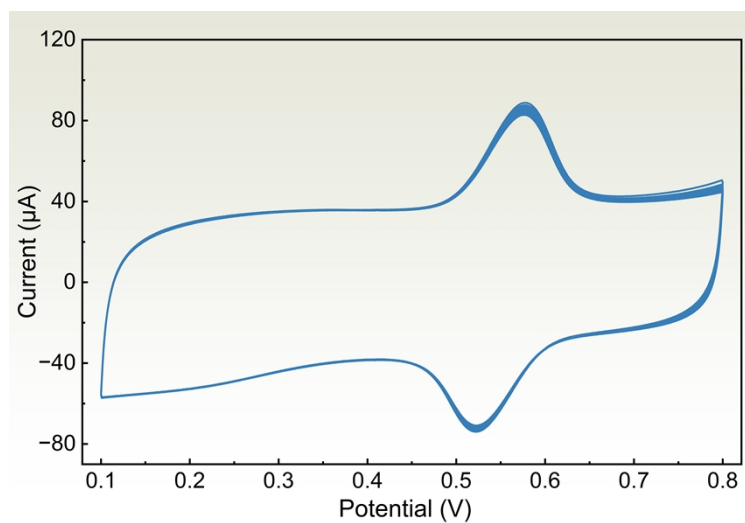

**Fig.S11.** Repeated cyclic voltammograms (15 consecutive cycles) of the Co@N-CNTs/3DHC/GCE.

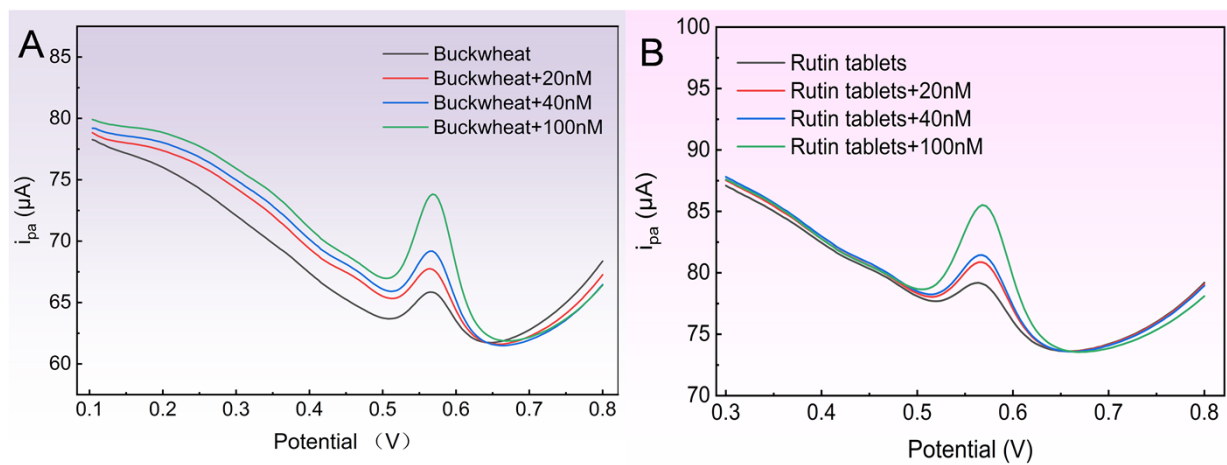

**Fig.S12.** Recovery test of rutin in real samples using the standard addition method. (A) DPV curves for a buckwheat extract. (B) DPV curves for a commercial rutin tablet sample.

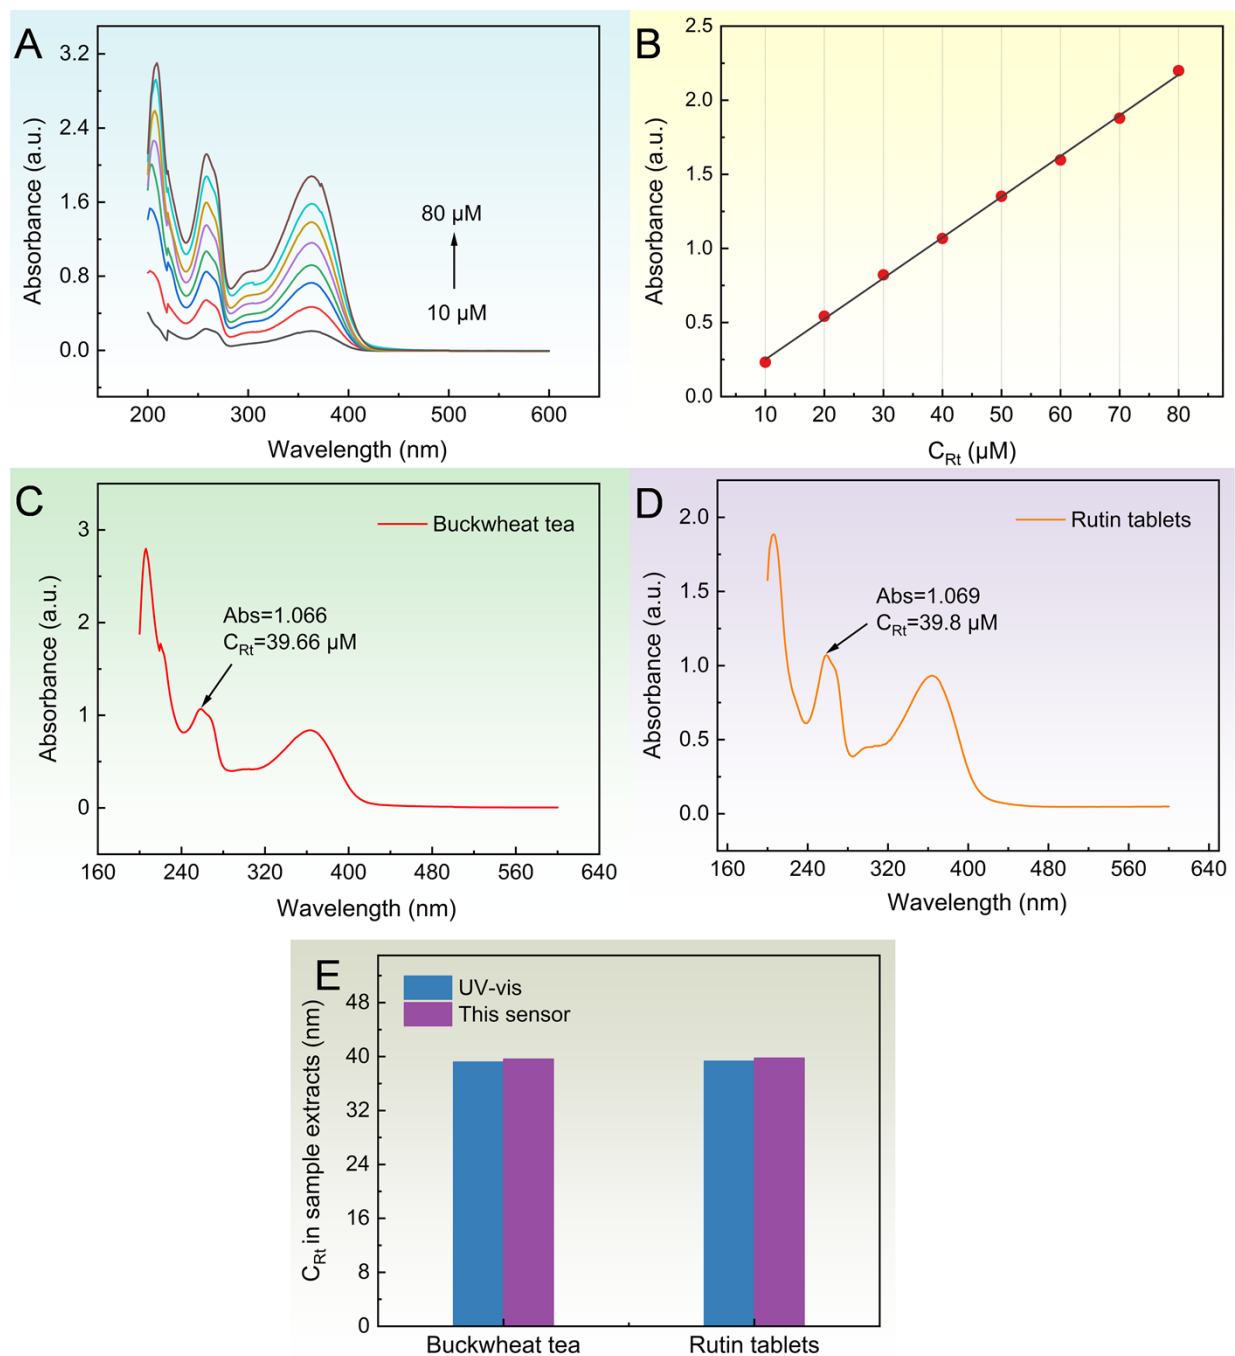

**Fig. S13.** (A) Ultraviolet-visible spectrum of the rutin standard solution; (B) Linear calibration curve of the rutin standard solution; (C) Ultraviolet-visible spectrum of the rutin tablet; (D) Ultraviolet-visible spectrum of the ethanol extract of tartary buckwheat; (E) Comparison of the detection of rutin in actual sample extracts by Co@N-CNTs/3DHC.

- [1] L. Li, L. Liu, J. Zhou, C. Gu, X. Wu, C. Lei, L. Yan, Cadmium telluride quantum dot-MXene composite-based electrochemical sensing platform for simultaneous determination of rutin and quercetin in foods, *Microchimica Acta* 192(4) (2025) 238.
- [2] F. Shi, Y. Ai, B. Wang, Y. Yao, Z. Zhang, J. Zhou, X. Wang, W. Sun, Portable Wireless Intelligent Electrochemical Sensor for the Ultrasensitive Detection of Rutin Using Functionalized Black Phosphorene Nanocomposite, *Molecules*, 2022.
- [3] X. Ma, W. Pang, Y. Gao, X. Chang, Z. Hu, T. Hu, A Paper-Based Electrochemical Sensor Based on Chain Structured ZIF-8@MWCNTs for Efficient Determination of Rutin, *Journal of The Electrochemical Society* 171(4) (2024) 047514.
- [4] C. Liu, H.-Y. Du, C. Xin, X. Di, Synthesis of porphyrin-based metal-organic framework and biomass-derived carbon composite for electrochemical detection of Rutin, *Journal of Electroanalytical Chemistry* 984 (2025) 119058.
- [5] K. Yang, F. Han, Y. Jin, X. Li, C-GCS@ZIF-F/PL based electrochemical sensor for rapid and ultra-sensitive detection of rutin in foods, *Food Chemistry* 460 (2024) 140382.
- [6] A. Şenocak, V. Sanko, S.O. Tümay, Y. Orooji, E. Demirbas, Y. Yoon, A. Khataee, Ultrasensitive electrochemical sensor for detection of rutin antioxidant by layered  $\text{Ti}_3\text{Al}_{0.5}\text{Cu}_{0.5}\text{C}_2$  MAX phase, *Food and Chemical Toxicology* 164 (2022) 113016.
- [7] H. Gu, X. Shui, Y. Zhang, T. Zeng, J. Yang, Z. Wu, X. Zhang, N. Yang, Porous carbon scaffolded Fe-based alloy nanoparticles for electrochemical quantification of acetaminophen and rutin, *Carbon* 221 (2024) 118954.
